# Supplementary material for: Controlling epithelial sodium channels with light using photoswitchable amilorides
Source: Springer Nature journal article supplement (doi:10.1038/nchem.2004), 2014-07-20
Supplement: 41557_2014_BFnchem2004_MOESM7_ESM.mol [file 41557_2014_BFnchem2004_MOESM7_ESM.mol]

  ChemDraw06301410512D

 29 31  0  0  0  0  0  0  0  0999 V2000
   -4.6441   -0.4125    0.0000 N   0  0  0  0  0  0  0  0  0  0  0  0
   -4.6441   -1.2375    0.0000 C   0  0  0  0  0  0  0  0  0  0  0  0
   -3.9296   -1.6500    0.0000 C   0  0  0  0  0  0  0  0  0  0  0  0
   -3.2151   -1.2375    0.0000 N   0  0  0  0  0  0  0  0  0  0  0  0
   -3.2151   -0.4125    0.0000 C   0  0  0  0  0  0  0  0  0  0  0  0
   -3.9296   -0.0000    0.0000 C   0  0  0  0  0  0  0  0  0  0  0  0
   -3.9296    0.8250    0.0000 N   0  0  0  0  0  0  0  0  0  0  0  0
   -3.9296   -2.4750    0.0000 Cl  0  0  0  0  0  0  0  0  0  0  0  0
   -5.3585   -1.6500    0.0000 N   0  0  0  0  0  0  0  0  0  0  0  0
   -2.5006   -0.0000    0.0000 C   0  0  0  0  0  0  0  0  0  0  0  0
   -1.7862   -0.4125    0.0000 N   0  0  0  0  0  0  0  0  0  0  0  0
   -2.5006    0.8250    0.0000 O   0  0  0  0  0  0  0  0  0  0  0  0
   -1.0717    0.0000    0.0000 C   0  0  0  0  0  0  0  0  0  0  0  0
   -0.3572   -0.4125    0.0000 N   0  0  0  0  0  0  0  0  0  0  0  0
   -1.0717    0.8250    0.0000 N   0  0  0  0  0  0  0  0  0  0  0  0
    0.3572    0.0000    0.0000 C   0  0  0  0  0  0  0  0  0  0  0  0
    1.0717   -0.4125    0.0000 C   0  0  0  0  0  0  0  0  0  0  0  0
    1.7862    0.0000    0.0000 C   0  0  0  0  0  0  0  0  0  0  0  0
    1.7862    0.8250    0.0000 C   0  0  0  0  0  0  0  0  0  0  0  0
    1.0717    1.2375    0.0000 C   0  0  0  0  0  0  0  0  0  0  0  0
    0.3572    0.8250    0.0000 C   0  0  0  0  0  0  0  0  0  0  0  0
    2.5006    1.2375    0.0000 N   0  0  0  0  0  0  0  0  0  0  0  0
    3.2151    0.8250    0.0000 N   0  0  0  0  0  0  0  0  0  0  0  0
    3.9296    1.2375    0.0000 C   0  0  0  0  0  0  0  0  0  0  0  0
    4.6441    0.8250    0.0000 C   0  0  0  0  0  0  0  0  0  0  0  0
    5.3585    1.2375    0.0000 C   0  0  0  0  0  0  0  0  0  0  0  0
    5.3585    2.0625    0.0000 C   0  0  0  0  0  0  0  0  0  0  0  0
    4.6441    2.4750    0.0000 C   0  0  0  0  0  0  0  0  0  0  0  0
    3.9296    2.0625    0.0000 C   0  0  0  0  0  0  0  0  0  0  0  0
  1  2  2  0      
  2  3  1  0      
  3  4  2  0      
  4  5  1  0      
  5  6  2  0      
  6  1  1  0      
  6  7  1  0      
  3  8  1  0      
  2  9  1  0      
  5 10  1  0      
 10 11  1  0      
 10 12  2  0      
 11 13  1  0      
 13 14  1  0      
 13 15  2  0      
 14 16  1  0      
 16 17  2  0      
 17 18  1  0      
 18 19  2  0      
 19 20  1  0      
 20 21  2  0      
 21 16  1  0      
 19 22  1  0      
 22 23  2  0      
 23 24  1  0      
 24 25  2  0      
 25 26  1  0      
 26 27  2  0      
 27 28  1  0      
 28 29  2  0      
 29 24  1  0      
M  END
